# Supplementary material for: Modelling the bioinformatics tertiary analysis research process
Source: Springer Nature journal article supplement (doi:10.1186/s12859-021-04310-5), 2021-09-30
Supplement: 12859_2021_4310_MOESM2_ESM.pdf [file 12859_2021_4310_MOESM2_ESM.pdf]

Unnamed area

Bioinformatic research

Data Extraction

Pre processing

Data Analysis

Quality control

Dta Cleaning

Alignment

Read Count

Data Exploration

Differential analysis

Functional Genomic Analysis

Execution of the control

Quality Assessment

Trimming

Download of reference genome

Pairing with the reference genome

Data merge

PCA

Normalization

Statistical tests

Analysis of visualizations
