# Supplementary material for: Modelling the bioinformatics tertiary analysis research process
Source: Springer Nature journal article supplement (doi:10.1186/s12859-021-04310-5), 2021-09-30

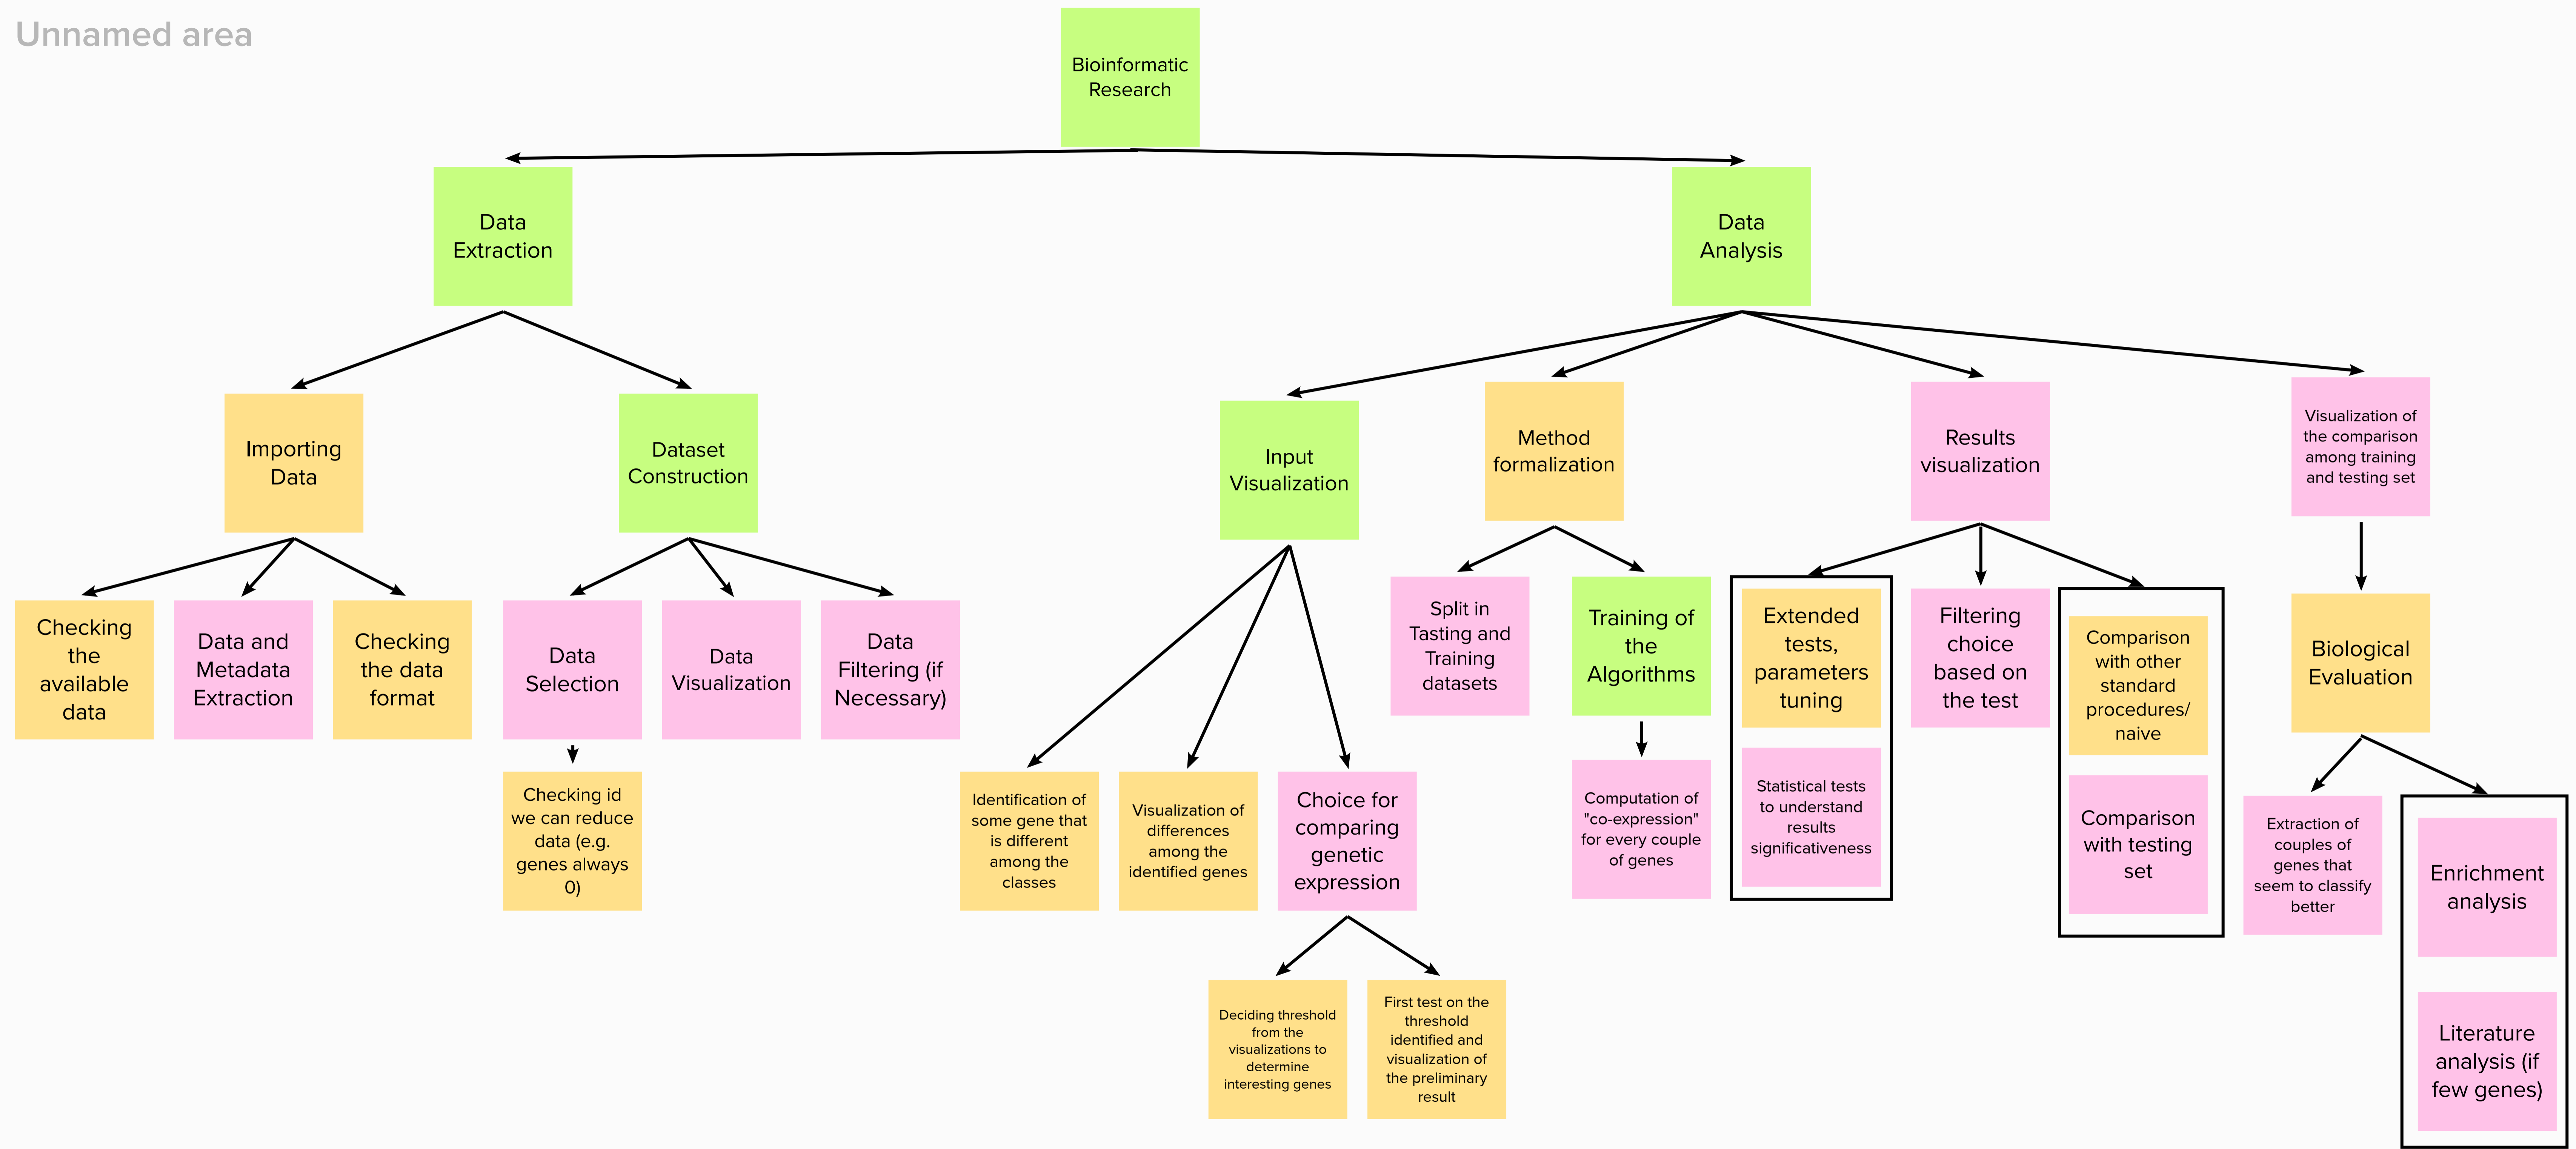

Supplement: 12859_2021_4310_MOESM4_ESM.pdf [file 12859_2021_4310_MOESM4_ESM.pdf]
